# Supplementary material
Source: MDPI journal article supplement (https://www.mdpi.com/2073-4441/11/1/104)
Supplement: s1 [file s1]

## Supplementary materials

# Treatment of liquid phase of digestate from agricultural biogas plant in a system with aerobic granules and ultrafiltration for wastewater reuse

Piotr Świątczak\*, Agnieszka Cydzik-Kwiatkowska, Magdalena Zielińska

University of Warmia and Mazury in Olsztyn, Department of Environmental Biotechnology, 10-709 Olsztyn, Słoneczna 45 G

\*Corresponding author: piotr.swiatczak@uwm.edu.pl, tel. +48 89 523 41 64, fax +48 89 5234131

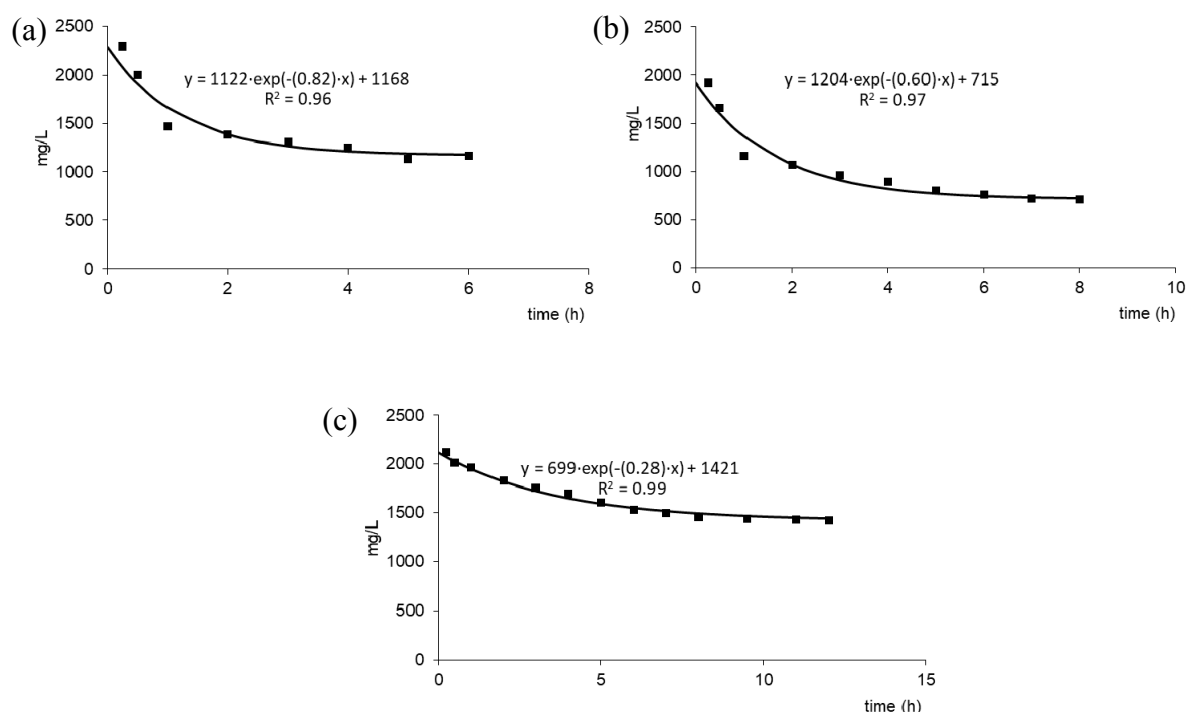

**Figure S1.** Kinetics of COD removal in the cycle of GSBRe<sub>6h</sub> (a), GSBRSrh (b) and GSBRe<sub>12h</sub> (c)

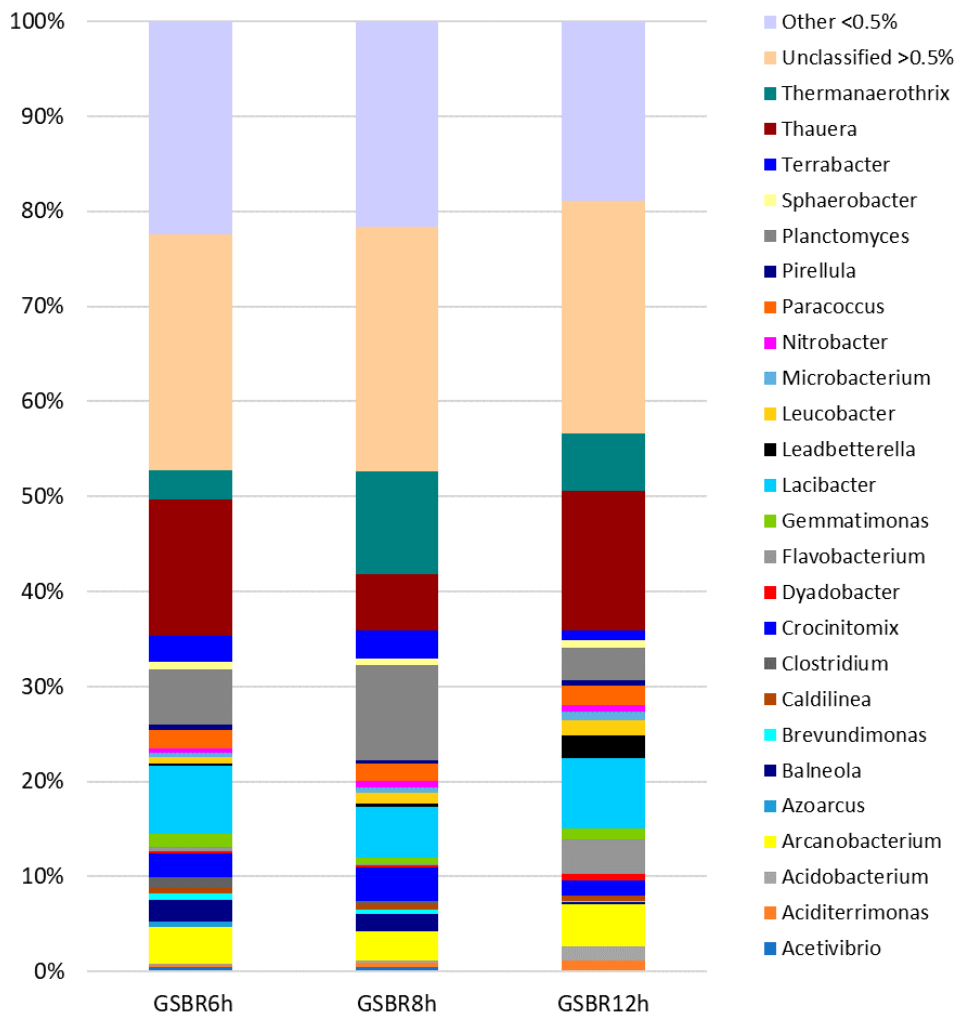

Figure S2. 2SM Bacterial taxa in granular sludge
